# Supplementary figures and images for: Self-organization of the 2-methoxyquinhydrone charge transfer complex in polar planes
Source: Royal Society of Chemistry journal article supplement (doi:10.1039/b700652g), 2007-01-01

### Raman spectra of methoxyquinhydrone **3** and non-substituted quinhydrone

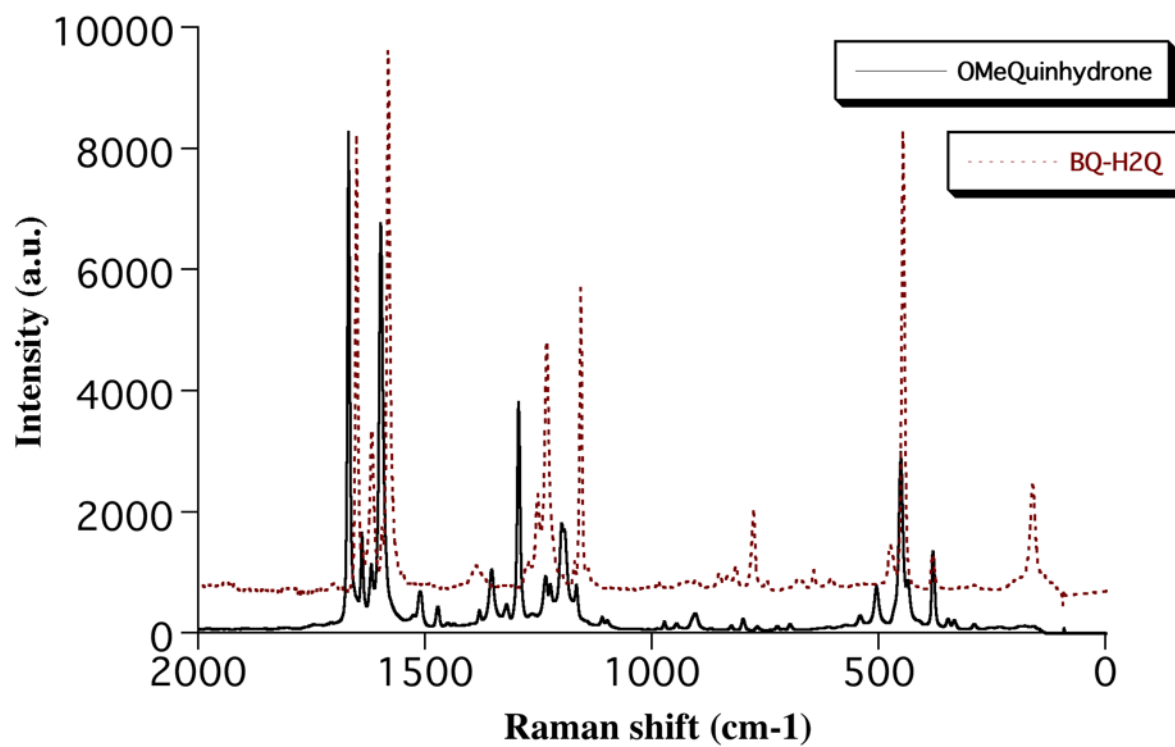

Supplement: b700652g.pdf [file b700652g.pdf]
